# Supplementary material for: Implementation of a Pediatric Early Warning Score to Improve Communication and Nursing Empowerment in a Rural District Hospital in Rwanda
Source: PubMed Central journal article supplement (PMC7784060; doi:10.9745/ghsp-d-20-00075), 2020-12-23
Supplement: 20-00075-Sridhar-Supplement.pdf [file 20-00075-Sridhar-Supplement.pdf]

## CLINICAL COMPETENCIES

COMPETENCY STATEMENT: The nurse safely and effectively obtains vital signs on a pediatric patient and determines and implements appropriate interventions.

| Respiratory       |                                                                                                                                                                                                        |            |   |   |          |
|-------------------|--------------------------------------------------------------------------------------------------------------------------------------------------------------------------------------------------------|------------|---|---|----------|
| Critical Element: |                                                                                                                                                                                                        | Evaluation |   |   | Comments |
|                   |                                                                                                                                                                                                        | I          | S | R |          |
| 1.                | <b>General Assessment</b>                                                                                                                                                                              |            |   |   |          |
|                   | Describes general rationale for accurate vital signs.                                                                                                                                                  |            |   |   |          |
|                   | Obtains complete respiratory assessment:<br>Respiratory rate<br>O <sub>2</sub> saturation<br>Work of breathing: (retractions, head bobbing, nasal flaring, breath sounds, symmetrical chest expansion) |            |   |   |          |
|                   | Documents accurately the findings of a thorough respiratory assessment in patient record.                                                                                                              |            |   |   |          |
|                   | Identifies trends and changes in the patient's condition that are different from the previous respiratory assessment.                                                                                  |            |   |   |          |
|                   | Identifies ABNORMAL findings on exam and reports them to preceptor and appropriate physicians.                                                                                                         |            |   |   |          |
| 2.                | <b>Oxygen Saturation</b>                                                                                                                                                                               |            |   |   |          |
|                   | Demonstrates correct application of oximetry probe and identification of a good wave form.                                                                                                             |            |   |   |          |
|                   | Defines normal limits for oxygen saturation.                                                                                                                                                           |            |   |   |          |
| 3.                | <b>Administration of Supplemental Oxygen</b>                                                                                                                                                           |            |   |   |          |
|                   | Identifies respiratory support modality appropriate for patient's level of respiratory distress.                                                                                                       |            |   |   |          |
|                   | Documents level of support in patient medical record.                                                                                                                                                  |            |   |   |          |
|                   | Performs a respiratory reassessment on patient following intervention (application of oxygen modality).                                                                                                |            |   |   |          |
| 4.                | <b>Pulmonary Toileting</b>                                                                                                                                                                             |            |   |   |          |
|                   | Performs repositioning and suctioning when necessary.                                                                                                                                                  |            |   |   |          |
|                   | If suctioning is required, selects adequate route and size suction catheter.                                                                                                                           |            |   |   |          |

| Cardiac Assessment |                                                                                                                                                                                                |            |   |   |          |
|--------------------|------------------------------------------------------------------------------------------------------------------------------------------------------------------------------------------------|------------|---|---|----------|
| Critical Element:  |                                                                                                                                                                                                | Evaluation |   |   | Comments |
|                    |                                                                                                                                                                                                | I          | S | R |          |
| 5                  | <b>General Assessment</b>                                                                                                                                                                      |            |   |   |          |
|                    | Describes general rationale for accurate vital signs.                                                                                                                                          |            |   |   |          |
|                    | Obtains complete cardiac assessment in addition to heart rate if necessary (ill child): capillary refill, skin color, edema<br>-On one patient is able to identify and record capillary refill |            |   |   |          |

### CLINICAL COMPETENCIES

|          |                                                                                                                                                                           |  |  |  |  |
|----------|---------------------------------------------------------------------------------------------------------------------------------------------------------------------------|--|--|--|--|
|          | Documents accurately the findings of a thorough cardiovascular assessment in patient record.                                                                              |  |  |  |  |
|          | Identifies trends and changes in the patient's condition that are different from the previous cardiac assessment.                                                         |  |  |  |  |
|          | Identifies ABNORMAL findings on exam and reports them to preceptor and appropriate physicians.                                                                            |  |  |  |  |
| <b>6</b> | <b>Heart Rate</b>                                                                                                                                                         |  |  |  |  |
|          | Demonstrates use of stethoscope to assess heart rate and physiologic locations to assess a patient's pulse.                                                               |  |  |  |  |
|          | Defines normal limits for heart rate, and verifies that mechanical tools are accurate.                                                                                    |  |  |  |  |
|          | Identifies need for supplemental support if a patient is bradycardic or tachycardic.                                                                                      |  |  |  |  |
|          | Identifies support modality appropriate for patient's level of perfusion derangement. Performs positioning, intravenous (IV) placement, fluid resuscitation as indicated. |  |  |  |  |
|          | Performs reassessment on patient following intervention.                                                                                                                  |  |  |  |  |

### MENTAL STATUS

| Critical Element: | Evaluation                                                                                                            |   |   | Comments |
|-------------------|-----------------------------------------------------------------------------------------------------------------------|---|---|----------|
|                   | I                                                                                                                     | S | R |          |
| <b>7</b>          | <b>General Assessment</b>                                                                                             |   |   |          |
|                   | Describes general rationale for accurate vital signs.                                                                 |   |   |          |
|                   | Completes a mental status assessment using AVPU (alert, verbal, pain, unresponsive) scoring                           |   |   |          |
|                   | Accurately documents the findings of a thorough mental status assessment                                              |   |   |          |
|                   | Identifies trends and changes in the patient's condition that are different from the previous respiratory assessment. |   |   |          |
|                   | Identifies ABNORMAL findings on exam and reports them to preceptor and appropriate physicians.                        |   |   |          |
| <b>8</b>          | <b>AVPU</b>                                                                                                           |   |   |          |
|                   | Demonstrates ability to categorize a patient using the AVPU tool.                                                     |   |   |          |
|                   | Identifies derangements or changes in mental status and documents this in the medical record.                         |   |   |          |
|                   | Identifies need for additional support for acute changes in mental status.                                            |   |   |          |
| <b>9</b>          | <b>Interventions</b>                                                                                                  |   |   |          |
|                   | Identifies possible causes and interventions appropriate for patient's level of alertness.                            |   |   |          |
|                   | Documents level of support in patient medical record.                                                                 |   |   |          |

### CLINICAL COMPETENCIES

|  |                                                            |  |  |  |  |
|--|------------------------------------------------------------|--|--|--|--|
|  | Performs a reassessment on patient following intervention. |  |  |  |  |
|--|------------------------------------------------------------|--|--|--|--|

| Temperature                 |                                                                                                         |   |  |  |   |   |          |
|-----------------------------|---------------------------------------------------------------------------------------------------------|---|--|--|---|---|----------|
| Critical Element:           | Evaluation                                                                                              | I |  |  | S | R | Comments |
|                             |                                                                                                         |   |  |  |   |   |          |
| <b>1 General Assessment</b> |                                                                                                         |   |  |  |   |   |          |
|                             | Describes general rationale for accurate vital signs.                                                   |   |  |  |   |   |          |
|                             | Accurately uses the thermometer.                                                                        |   |  |  |   |   |          |
|                             | Accurately documents the findings (temperature).                                                        |   |  |  |   |   |          |
|                             | Identifies trends and changes in the patient's condition that are different from the previous readings. |   |  |  |   |   |          |
|                             | Identifies ABNORMAL readings on examination and reports them to preceptor and appropriate physicians.   |   |  |  |   |   |          |
| <b>1 Interventions</b>      |                                                                                                         |   |  |  |   |   |          |
|                             | Identifies possible causes and interventions appropriate for a fever or hypothermia.                    |   |  |  |   |   |          |
|                             | Documents level of support in patient medical record.                                                   |   |  |  |   |   |          |
|                             | Rechecks temperature of patient following intervention.                                                 |   |  |  |   |   |          |

| Pediatric Early Warning Score (PEWS) |                                                                                                             |   |  |  |   |   |          |
|--------------------------------------|-------------------------------------------------------------------------------------------------------------|---|--|--|---|---|----------|
| Critical Element:                    | Evaluation                                                                                                  | I |  |  | S | R | Comments |
|                                      |                                                                                                             |   |  |  |   |   |          |
| <b>1 General Assessment</b>          |                                                                                                             |   |  |  |   |   |          |
|                                      | Describes general rationale for accurate vital signs.                                                       |   |  |  |   |   |          |
|                                      | Calculates a PEWS scores.                                                                                   |   |  |  |   |   |          |
|                                      | Accurately documents the score.                                                                             |   |  |  |   |   |          |
|                                      | Identifies ABNORMAL scores and reports them to preceptor and appropriate physicians.                        |   |  |  |   |   |          |
|                                      | Accurately identifies and describes the meaning of changes in PEW scores.                                   |   |  |  |   |   |          |
| <b>2 Interventions</b>               |                                                                                                             |   |  |  |   |   |          |
|                                      | Identifies possible causes and interventions.                                                               |   |  |  |   |   |          |
|                                      | Documents level of support in patient medical record.                                                       |   |  |  |   |   |          |
|                                      | Performs a reassessment on patient following intervention within the appropriate time from (for PEW score). |   |  |  |   |   |          |

Method of Evaluation: Direct Observation \* Comments – if needed please write on back of page

Overall Clinical Evaluation: \_\_\_\_\_

Method of Evaluation: Direct Observation \* Comments – if needed please write on back of page

## CLINICAL COMPETENCIES

I: Independent    S: With Supervision R: Needs Remediation

I, the undersigned, have demonstrated the necessary knowledge, skills, attitudes, values, and/or abilities to be deemed competent in caring for a neonate during admission to the Neonatal Intensive Care Unit. I acknowledge that ongoing development and maintenance of competency is my responsibility and will be evidenced in my Professional Practice Portfolio.

Nurse Signature .....Date...../...../.....

Assessor (Preceptor or CNE/F) Name..... Signature ..... Date...../...../.....
